# Supplementary material
Source: PubMed Central journal article supplement (PMC4966437)
Supplement: JB.00101-16_zjb999094124so1.pdf [file JB.00101-16_zjb999094124so1.pdf]

## Supplementary

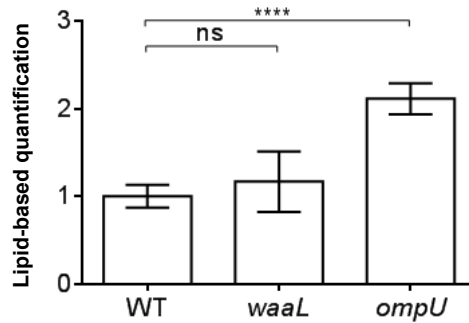

**Fig. S1. Relative OMV production by *V. fischeri* mutants.** OMVs were prepared from culture supernatants of wild type cells (WT), or of a *waaL* or *ompU* derivative. The relative amounts of OMVs made were determined using the FM4-64 lipid-based assay. One way ANOVA; ns, not significant; \*\*\*\*,  $p < 0.02$ .

## Supplementary

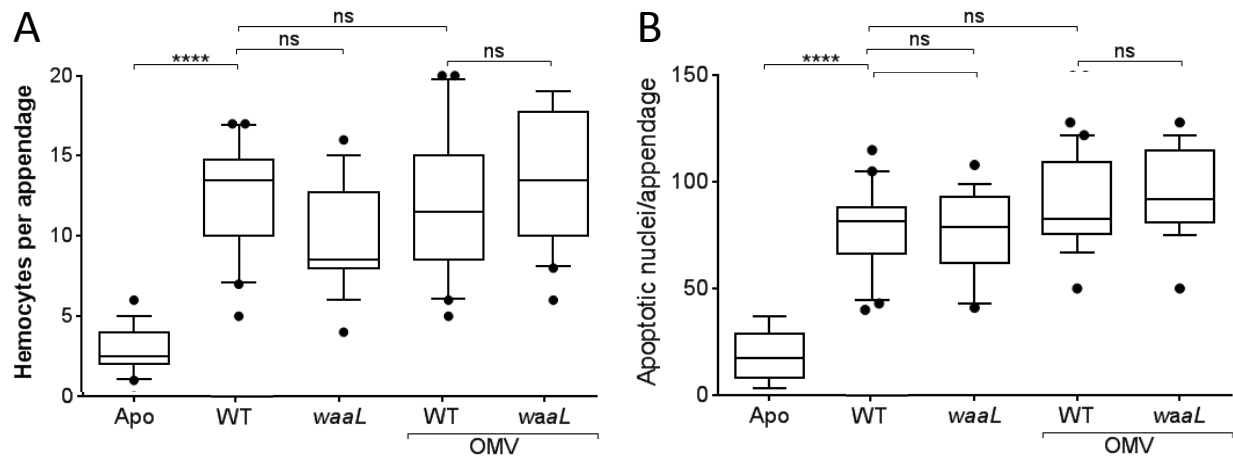

**Fig. S2. The *V. fischeri* O-antigen is not required for OMV-induced responses. (A-B)** Animals were either inoculated with no *V. fischeri* cells (Apo), wild-type cells (WT), or cells of an O-antigen deficient mutant (*waaL*), or exposed to OMVs (50  $\mu$ g of OMV protein/mL) released by those two strains. **(A)** Level of hemocyte trafficking, or **(B)** counts of apoptotic nuclei, in the anterior appendages of animals exposed for 18 or 24 h respectively. One-way ANOVA (for **A**,  $F=31$ ; for **B**  $F=16$ ); ns, not significant; \*\*\*\*,  $p<0.0001$ ;  $n=20$ .

## Supplementary

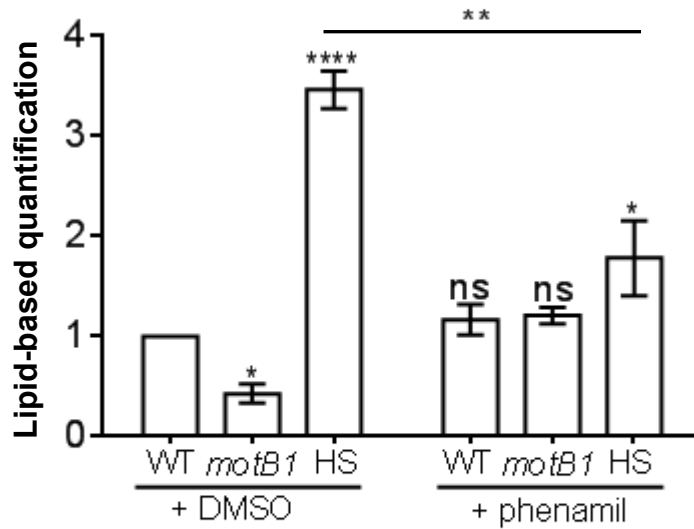

**Fig. S3. Effect of phenamil treatment on OMV release.** Fold-change, relative to wild type (WT) without phenamil treatment, of OMV production by a non-motile mutant (*motB1*) or a hypermotile mutant (HS), in the presence of either the flagellar-motor inhibitor, phenamil (40  $\mu$ M), or the solvent carrier, DMSO. OMVs were quantified by a lipid-based assay; values are the average  $\pm$ SEM, n=3.

## Supplementary

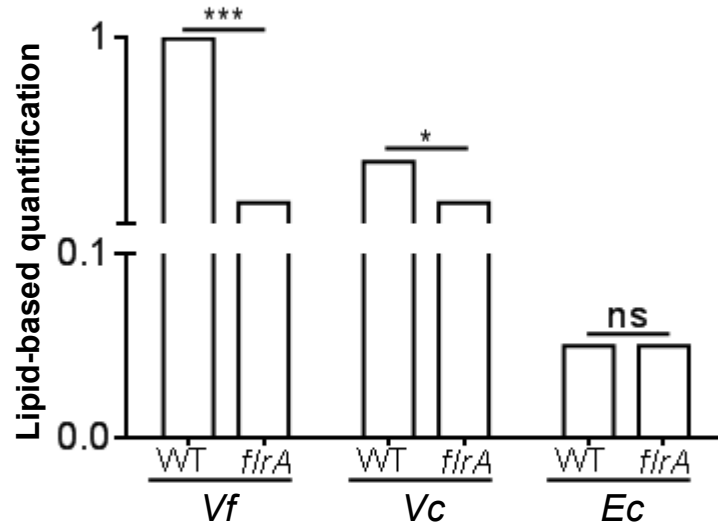

**Fig. S4. Sheathed flagella linked to increased OMV production.** Fold-difference, relative to wild-type (WT) *V. fischeri*, of OMV production by WT and aflagellate (*flrA*) strains of *V. fischeri* (Vf), *V. cholerae* (Vc) or *E. coli* (Ec). OMVs were quantified by a lipid-based assay; values are the average  $\pm$ SEM, n=3.

## Supplementary

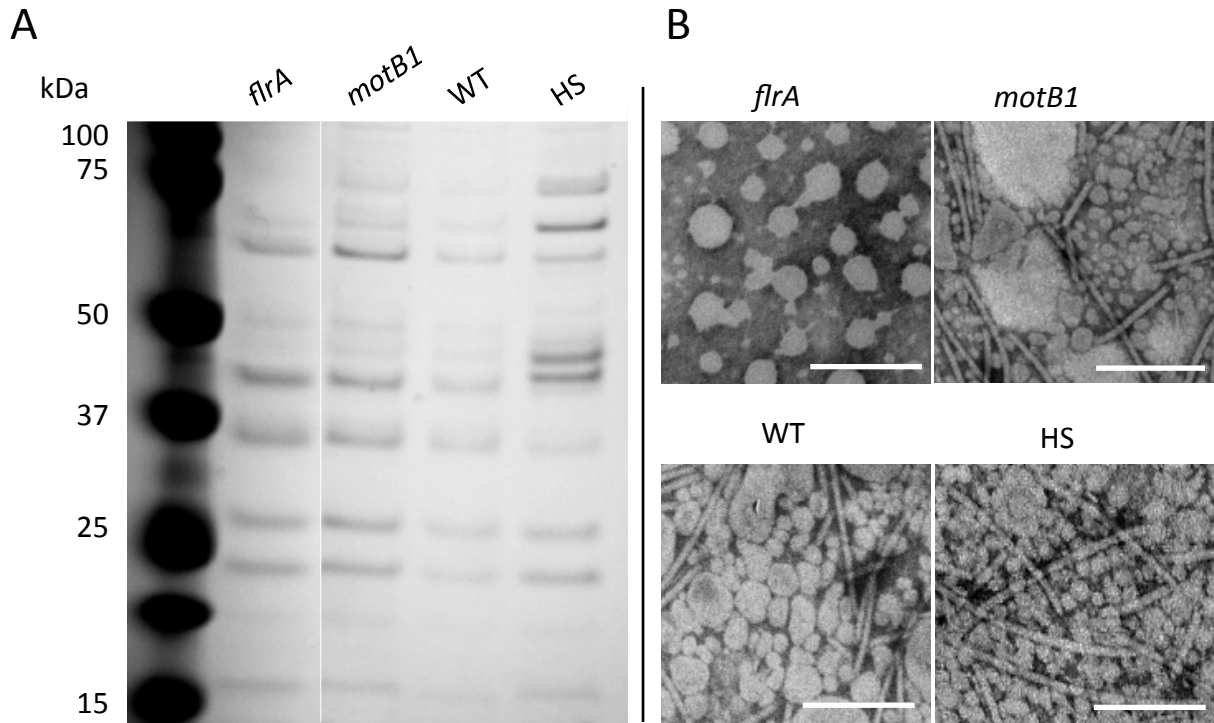

**Fig. S5. Comparison of OMVs released by *V. fischeri* motility mutants.** (A) Coomassie-stained SDS-PAGE gel showing protein profiles of OMV produced by the *V. fischeri* aflagellate mutant (*flrA*), the non-rotating motility mutant (*motB1*), the parental strain ES114 (WT), or a spontaneous hyperflagellated mutant (HS). Each well was loaded with 1.2  $\mu\text{g}$  of protein. (B) TEM images of OMVs prepared from the indicated strains, prior to sucrose gradient purification (sheathed flagella fragments are still present in all but the aflagellate *flrA* prep); scale bars = 200 nm.
